# Supplementary material
Source: publisher site journal article supplement (https://www.dovepress.com/article/334987)
Supplement: Supplementary file 1 [file get_supplementary_file.php]

**Supplement File**

**Development and Implementation of an e-Trigger Tool for Adverse Drug Events in a Swiss University Hospital**

Amina El Saghir1,*, Georgios Dimitriou2,*, Miriam Scholer3, Ioanna Istampoulouoglou1, Patrick Heinrich3, Klaus Baumgartl3, René Schwendimann4, Stefano Bassetti2, Anne Leuppi-Taegtmeyer1

*These authors contributed equally to this work and shared first authorship

1 Department of Clinical Pharmacology & Toxicology, University Hospital and University of Basel

2  Division of Internal Medicine, University and University Hospital Basel, Switzerland

3 Department of Information Technology, University Hospital Basel

4 Patient Safety Office, University Hospital Basel

**Corresponding author**: Anne Leuppi-Taegtmeyer, Department of Clinical Pharmacology & Toxicology, University Hospital Basel, Schanzenstrasse 55, CH4031 Basel, Switzerland

anne.leuppi-taegtmeyer@usb.ch

**Supplement Table S1** The classes of medication involved in the occurrence of adverse drug events

| **ATC codes** | **Drug class** | **Number of patients n = 189 (% of patients with an ADE)** | |
| --- | --- | --- | --- |
| B01A | Antithrombotic agents | | 28 (14.8) |
| N02A | Opioids | | 24 (12.7) |
| L01 | Antineoplastic agents | | 23 (12.2) |
| L01X | Other antineoplastic agents | | 18 (9.5) |
| N02B | Other analgesics and antipyretics | | 15 (7.9) |
| L01B | Antimetabolites | | 13 (6.9) |
| L04A | Immunosuppressant’s | | 12 (6.3) |
| J01C | Beta-lactam antibacterial, penicillin’s | | 11 (5.8) |
| M01A | Antiinflammatory and antirheumatic products, non-steroids | | 11 (5.8) |
| H02 | Corticosteroids for systemic use | | 11 (5.8) |
| C03B | Low-ceiling diuretics | | 11 (5.8) |
| C03D | Potassium-sparing agents | | 10 (5.3) |
| C03C | High-ceiling diuretics | | 8 (4.2) |
| C09A | ACE-Inhibitors | | 5 (2.6) |
| L01A | Alkylating agents | | 5 (2.6) |
| A10B | Blood glucose lowering drugs, excl. insulins | | 4 (2.1) |
| J01D | Other beta-lactam antibacterial | | 4 (2.1) |
| J05A | Direct acting antivirals | | 4 (2.1) |
| J01 | Antibacterial for systemic use | | 3 (1.6) |
| N05A | Antipsychotics | | 3 (1.6) |
| N05B | Anxiolytics | | 3 (1.6) |
| A12C | Other mineral supplements | | 3 (1.6) |
| J01F | Macrolides, lincosamides and streptogramins | | 3 (1.6) |
| L01C | Plant alkaloids and other natural products | | 3 (1.6) |
| N05C | Hypnotic and sedatives | | 3 (1.6) |
| C01B | Antiarrhythmics class I and II | | 2 (1.1) |
| N01A | Anesthetics, general | | 2 (1.1) |
| C09D | Angiotensin II Receptor Blockers (ARBs, Combinations | | 2 (1.1) |
| N06A | Antidepressant | | 2 (1.1) |
| M04A | Antigout preparations | | 2 (1.1) |
| C07A | Beta blocking agents | | 2 (1.1) |
| A02B | Drugs for peptic ulcer and gastro-oesophageal reflux disease (GORD) | | 2 (1.1) |
| C08C | Selective calcium channel blockers with mainly vascular effects | | 2 (1.1) |
| C01D | Vasodilators used in cardiac diseases | | 2 (1.1) |
| A02A | Antacids | | 1 (0.5) |
| N03A | Antiepileptics | | 1 (0.5) |
| J02A | Antimycotics for systemic use | | 1 (0.5) |
| H03B | Antithyroid preparations | | 1 (0.5) |
| M03B | Muscle relaxants, centrally acting agents | | 1 (0.5) |
| P01A | Agents against amoebiasis and other protozoal diseases | | 1 (0.5) |
| A06A | Drugs for constipation | | 1 (0.5) |
| L03A | Immunostimulants | | 1 (0.5) |
| A10A | Insulin and analogues | | 1 (0.5) |
| R03B | Other drugs for obstructive airway diseases, inhalants | | 1 (0.5) |
| G04B | Urologicals | | 1 (0.5) |
| A11C | Vitamin A and D, incl. combination of the two | | 1 (0.5) |
|  | Others | | 3 (1.6) |

**Supplement Table S2** Data used for causality analysis of adverse events

| **Parameter** | **Data source** |
| --- | --- |
| Concomitant medication | Electronic prescription chart (software solution provided by MEONA GmbH, Freiburg in Breisgau, Germany) |
| Concurrent diagnoses | Electronic patient chart (software solution provided by ProtecData AG, Boswil, Switzerland) |
| Clinical chemistry values | Laboratory results database (software solution provided by Dorner Health IT solutions, DORNER GmbH & Co. KG, Müllheim, Germany) |
| Clinical hematology values | Laboratory results database (software solution provided by Dorner Health IT solutions, DORNER GmbH & Co. KG, Müllheim, Germany) |
| Intensive care unit data | Electronic patient and prescription chart (software solution provided by MetaVision, iMDSoft, Tel Aviv, Israel) |
| Radiology reports | Picture archiving and communication system (CentritictyTM Universal Viewer Zero Footprint, GE Healthcare, Chicago USA) |

**Supplement Table S3** WHO-UMC Causality Categories

| **Causality term** | **Assessment criteria*** |
| --- | --- |
| **Certain** | • Event or laboratory test abnormality, with plausible time relationship to drug intake • Cannot be explained by disease or other drugs • Response to withdrawal plausible (pharmacologically, pathologically) • Event definitive pharmacologically or phenomenologically (i.e. an objective and specific medical disorder or a recognised pharmacological phenomenon) • Rechallenge satisfactory, if necessary |
| **Probable/Likely** | • Event or laboratory test abnormality, with reasonable time relationship to drug intake • Unlikely to be attributed to disease or other drugs • Response to withdrawal clinically reasonable • Rechallenge not required |
| **Possible** | • Event or laboratory test abnormality, with reasonable time relationship to drug intake • Could also be explained by disease or other drugs • Information on drug withdrawal may be lacking or unclear |
| **Unlikely** | • Event or laboratory test abnormality, with a time to drug intake that makes a relationship improbable (but not impossible) • Disease or other drugs provide plausible explanations |
| **Conditional/Unclassified** | • Event or laboratory test abnormality • More data for proper assessment needed, or • Additional data under examination |
| **Unassessable/Unclassifiable** | • Report suggesting an adverse reaction • Cannot be judged because information is insufficient or contradictory • Data cannot be supplemented or verified |

**Notes:** * All points should be reasonably complied with.

The use of the WHO-UMC system for standardised case causality assessment. Available from: <http://www.WHO-UMC.org/graphics/4409.pdf>. Last accessed September 2021.16
